# Supplementary material for: Facile hydrothermal synthesis and photocatalytic activity of bismuth tungstate hierarchical hollow spheres with an ultrahigh surface area
Source: Royal Society of Chemistry journal article supplement (doi:10.1039/b923443h), 2010-01-01
Supplement: b923443h.pdf [file b923443h.pdf]

## Electronic Supplementary Information

### Facile hydrothermal synthesis and photocatalytic activity of bismuth tungstate hierarchical hollow spheres with an ultrahigh surface area

Xiao-Jun Dai,<sup>a,b</sup> Yong-Song Luo,<sup>\*a,b</sup> Wei-Dong Zhang,<sup>a</sup> and Shao-Yun Fu<sup>\*a,c</sup>

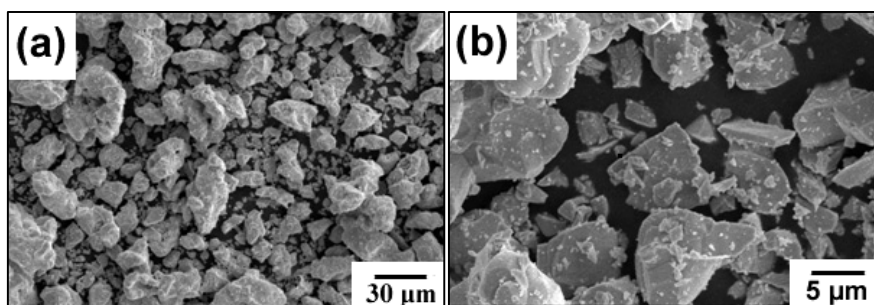

**Fig. S1** (a) Low-magnification SEM image of the irregular  $\text{Bi}_2\text{WO}_6$  powders according to the traditional solid-state reaction (SSR) method;<sup>33</sup> (b) high-magnification SEM image of the irregular  $\text{Bi}_2\text{WO}_6$  powders.

---

<sup>\*a</sup>Technical Institute of Physics and Chemistry, Chinese Academy of Sciences, Beijing 100190, China. E-mails: [syfu@mail.ipc.ac.cn](mailto:syfu@mail.ipc.ac.cn); [ysluo@mail.ipc.ac.cn](mailto:ysluo@mail.ipc.ac.cn).

<sup>b</sup>Department of Physics & Electronic Engineering, Xinyang Normal University, Xinyang 464000, China.

<sup>c</sup>International Centre for Materials Physics, Chinese Academy of Sciences, Shenyang 110016, China.

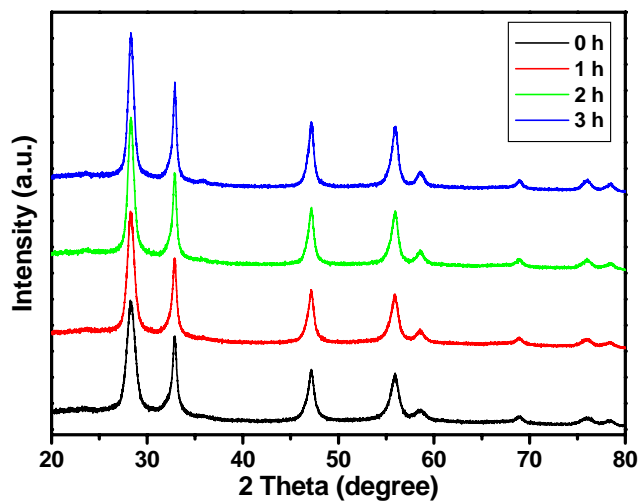

**Fig. S2** XRD patterns for the Bi<sub>2</sub>WO<sub>6</sub> products synthesized at various times.

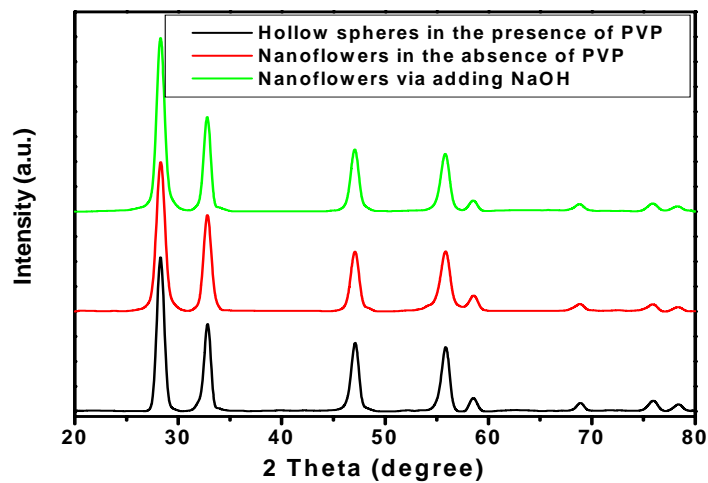

**Fig. S3** XRD patterns of the different morphological Bi<sub>2</sub>WO<sub>6</sub> products produced under different conditions.

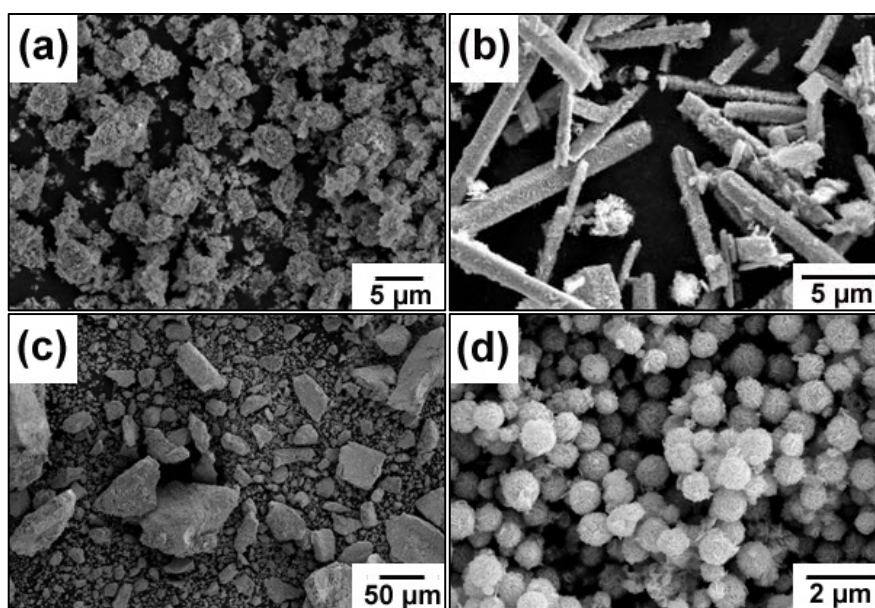

**Fig. S4** Typical SEM images of the Bi<sub>2</sub>WO<sub>6</sub> products synthesized at different H<sub>2</sub>O/C<sub>2</sub>H<sub>5</sub>OH/CH<sub>3</sub>COOH volume ratios of (a) 1:0:3, (b) 1:1:0, (c) 1:5:2 and (d) 1:5:7.

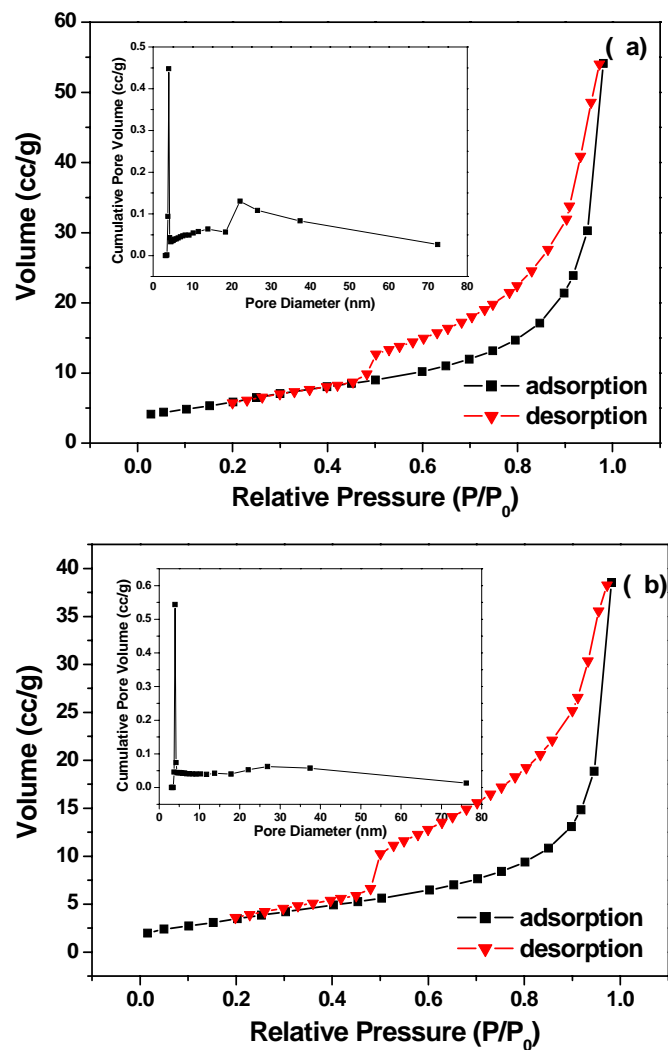

**Fig. S5** Nitrogen adsorption-desorption and pore-size distribution isotherm of the prepared (a) Bi<sub>2</sub>WO<sub>6</sub> flowers in the absence of PVP, (b) Bi<sub>2</sub>WO<sub>6</sub> flowers via the addition of NaOH.
